# Supplementary material for: Testicular Ultrasound Analysis as a Predictive Tool of Ram Sperm Quality
Source: MDPI journal article supplement (doi:10.3390/biology11020261), 2022-02-08
Supplement: s1 [file s1]

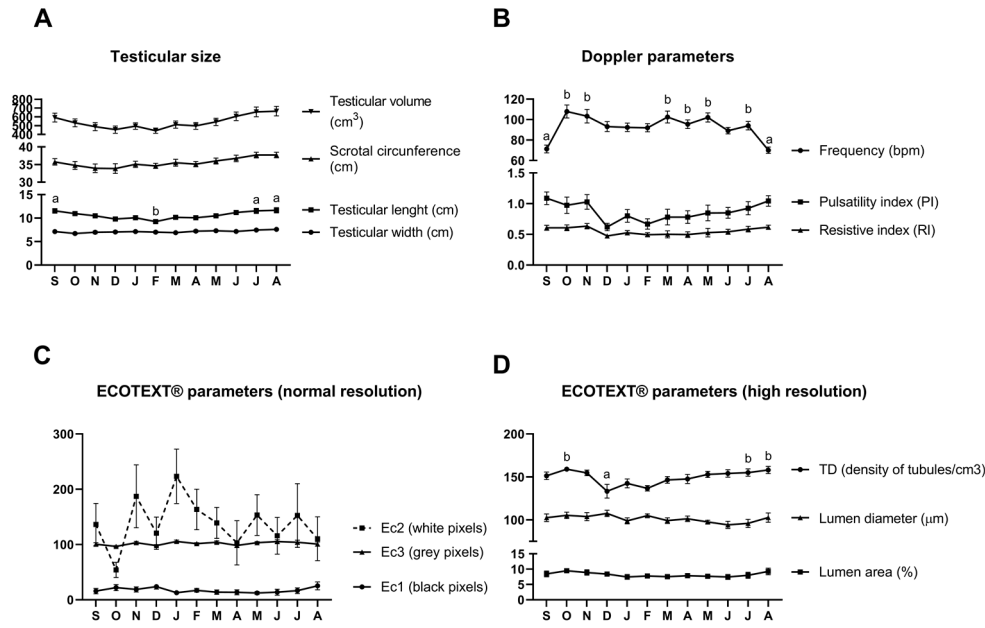

Figure S1: Monthly differences in testicular size (A), echotexture (C and D) and testicular-artery blood supply (B) in Rasa Aragonesa rams. Results are shown as mean  $\pm$  SEM of  $n = 8$ . Different let-ters indicate  $p < 0.05$ .

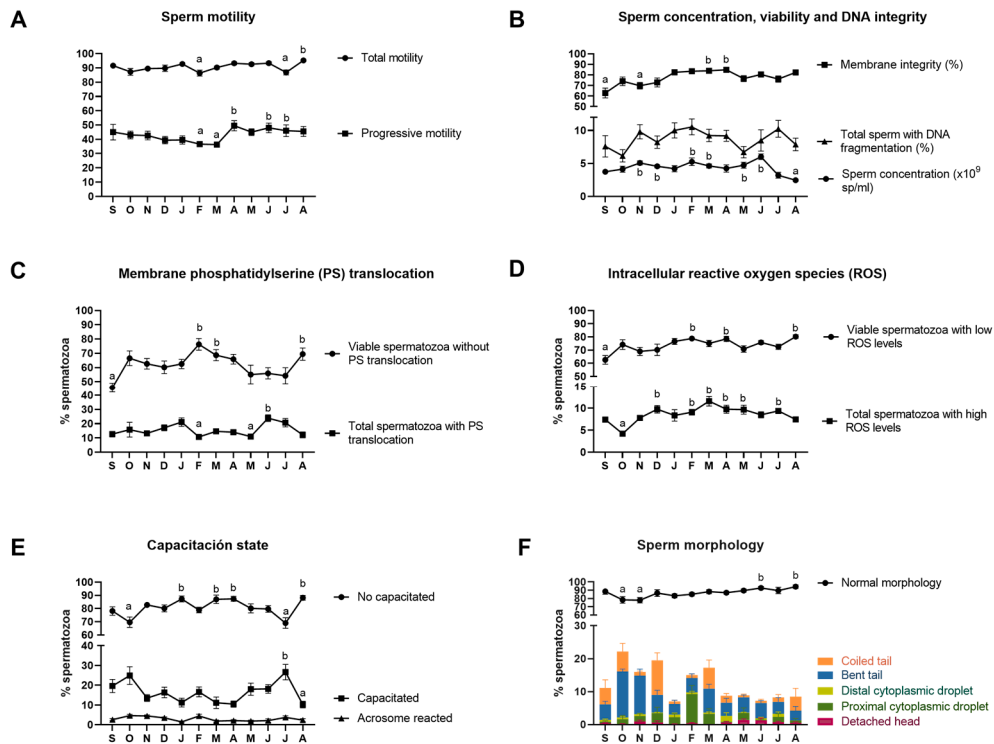

Figure S2: Monthly differences in seminal quality parameters in Rasa Aragonesa rams. Results are shown as mean  $\pm$  SEM of  $n = 8$ . Different letters indicate  $p < 0.05$ .
