# Supplementary material for: Testicular Ultrasound Analysis as a Predictive Tool of Ram Sperm Quality
Source: MDPI journal article supplement (doi:10.3390/biology11020261), 2022-02-08
Supplement: s1 [file s1]

**Supplemental Table S1:** Differences in testicular size, echotexture parameters (evaluated by ultrasound video-analysis and ECOTEXT® software) and testicular artery blood flow (assessed by Color-Doppler flow imaging) between left and right testicles in Rasa Aragonesa rams. Results are shown as mean  $\pm$  SEM of n=96. Different letters indicate  $P < 0.05$ .

|                                          | Left testis                    | Right testis                   |
|------------------------------------------|--------------------------------|--------------------------------|
| <b>Testicular size</b>                   |                                |                                |
| Testicular width (cm)                    | 7.11 $\pm$ 0.07                | 7.17 $\pm$ 0.06                |
| Testicular length (cm)                   | 10.69 $\pm$ 0.14 <sup>a</sup>  | 10.51 $\pm$ 0.14 <sup>b</sup>  |
| <b>ECOTEXT® parameters</b>               |                                |                                |
| Ec1 (black pixels)                       | 20.38 $\pm$ 2.18               | 18.43 $\pm$ 1.9                |
| Ec2 (white pixels)                       | 165.27 $\pm$ 16.55             | 184.23 $\pm$ 20.63             |
| Ec3 (grey pixels)                        | 101.61 $\pm$ 0.84              | 102.09 $\pm$ 0.95              |
| TD (density of tubules/cm <sup>3</sup> ) | 151.63 $\pm$ 1.53 <sup>a</sup> | 147.04 $\pm$ 1.78 <sup>b</sup> |
| LA (lumen area, %)                       | 8.31 $\pm$ 0.26                | 8.07 $\pm$ 0.24                |
| LD (lumen diameter, $\mu$ m)             | 100.87 $\pm$ 1.33              | 101.49 $\pm$ 1.32              |
| <b>Doppler parameters</b>                |                                |                                |
| Frequency (bpm)                          | 91.44 $\pm$ 1.77 <sup>a</sup>  | 94.08 $\pm$ 1.8 <sup>b</sup>   |
| RI (Resistive index)                     | 0.55 $\pm$ 0.01                | 0.56 $\pm$ 0.02                |
| PI (Pulsatility index)                   | 0.86 $\pm$ 0.03                | 0.88 $\pm$ 0.04                |
